# Supplementary material for: A host–guest complexation based fluorescent probe for the detection of paraquat and diquat herbicides in aqueous solutions
Source: Royal Society of Chemistry journal article supplement (doi:10.1039/c5ra18335a), 2015-01-01
Supplement: c5ra18335a1.pdf [file c5ra18335a1.pdf]

## Supporting information

Gui-Xian Song<sup>a,b</sup>, Qing Tang<sup>a</sup>, Ying Huang<sup>\*,a,b</sup>, Ruibing Wang<sup>c</sup>, Yun-Yun Xi<sup>b</sup>, Xin-Long Ni<sup>b</sup>, Zhu Tao<sup>b</sup>, Sai-Feng Xue<sup>b</sup>, Jian-Xin Zhang<sup>\*,d</sup>

<sup>a</sup> The Engineering and Research Center for Southwest Bio-Pharmaceutical Resources of National Education Ministry of China, Guizhou University, Guiyang 550025, China

<sup>b</sup> Key Laboratory of Macrocyclic and Supramolecular Chemistry of Guizhou Province, Guizhou University, Guiyang 550025, China

<sup>c</sup> State Key Laboratory of Quality Research in Chinese Medicine, Institute of Chinese Medical Sciences, University of Macau, Taipa, Macau SAR

<sup>d</sup> Key Laboratory of Chemistry for Natural Products of Guizhou Province, Guiyang 550002, China

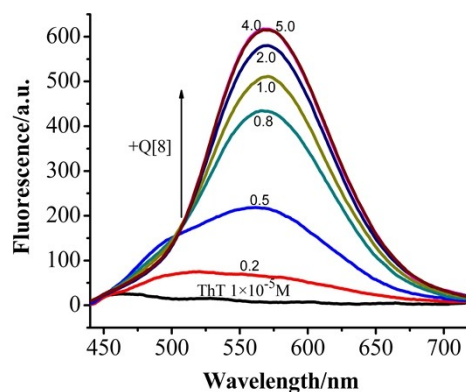

**Fig.1S** Fluorescence spectra of ThT ( $C_{\text{ThT}}=2 \times 10^{-5} \text{ mol L}^{-1}$ ) with Q[8] (0, 0.2, 0.5, 0.8, 1.0, 2.0, 4.0, and 5.0 equiv.) in aqueous solution ( $\lambda_{\text{ex}}=406 \text{ nm}$ , slit: 10 nm/10 nm)

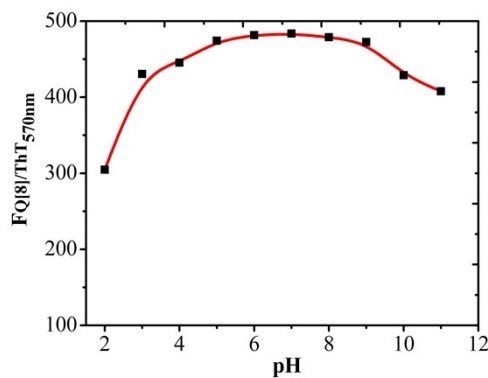

**Fig.2S** Fluorescence spectra of Q[8]-ThT ( $C_{\text{Q[8]}}=2 \times 10^{-5} \text{ mol L}^{-1}$ ,  $C_{\text{ThT}}=2 \times 10^{-5} \text{ mol L}^{-1}$ ) with different pH ( $\lambda_{\text{ex}}=406 \text{ nm}$ , slit: 10 nm/10 nm)

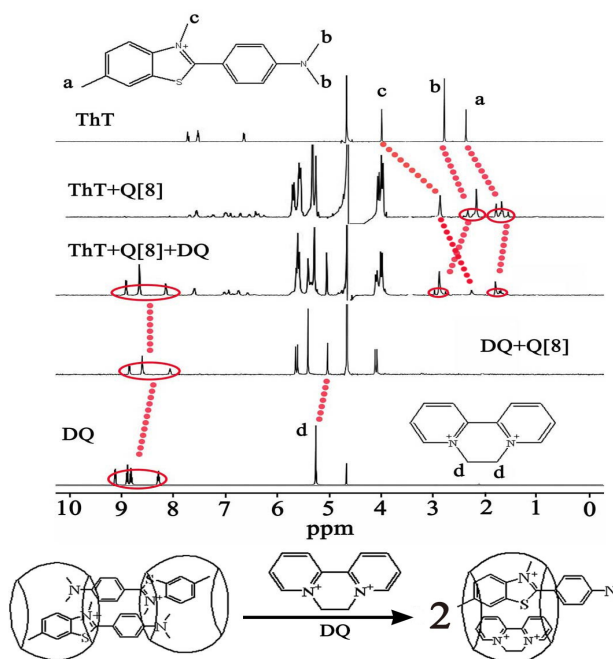

**Fig.3S**  $^1\text{H}$  NMR spectra (400 MHz,  $\text{D}_2\text{O}$ ) of ThT, DQ in the absence and in the presence of 1 equivalent of Q[8].

#### DOSY-NMR experiments:

Both free PQ and DQ diffusion coefficients are around  $6.2 \times 10^{-10} \text{ m}^2/\text{s}$  with very narrow coefficient distribution (see the Fig.4S-a and Fig.4S-d for PQ and DQ DOSY spectra, respectively).

When 1 equivalent molar quantity of PQ or DQ was added into ThT-Q[8] system, the complexed PQ or DQ diffusion coefficient decreased to the range of  $2.4$  to  $5.6 \times 10^{-10} \text{ m}^2/\text{s}$  with very broad diffusion coefficient value distribution, whereas the rest species (ThT-Q[8]) were centered around  $2.4 \times 10^{-10} \text{ m}^2/\text{s}$ . Therefore, PQ or DQ is likely shuttling rapidly in and out of the Q[8] cavity (where ThT is sitting in tightly due to its higher binding affinity with Q[8] than that of PQ or DQ based on ITC data) (see the Fig.4S-b and Fig.4S-e for PQ-ThT-Q[8] and DQ-ThT-Q[8] DOSY spectra, respectively)

When large excess of PQ or DQ was added into ThT-Q[8] system, the DQ diffusion coefficient moved to around  $5.2 \times 10^{-10} \text{ m}^2/\text{s}$  and  $4.8 \times 10^{-10} \text{ m}^2/\text{s}$ , respectively. Whereas the rest (ThT-Q[8]) were still centered around  $2.4 \times 10^{-10} \text{ m}^2/\text{s}$ , implying majority of PQ or DQ in this case is in the free form and only a portion of them is shuttling rapidly between free and complexed state (see the Fig.4S-c and Fig.4S-f for excess PQ or DQ with ThT-Q[8], respectively).

**These collective evidence based on 2D DOSY-NMR spectra, as well as  $^1\text{H}$  NMR spectra of these ternary systems presented in the main text and supporting information, suggest that these herbicides individually form ternary complex PQ(or DQ)-ThT-Q[8].**

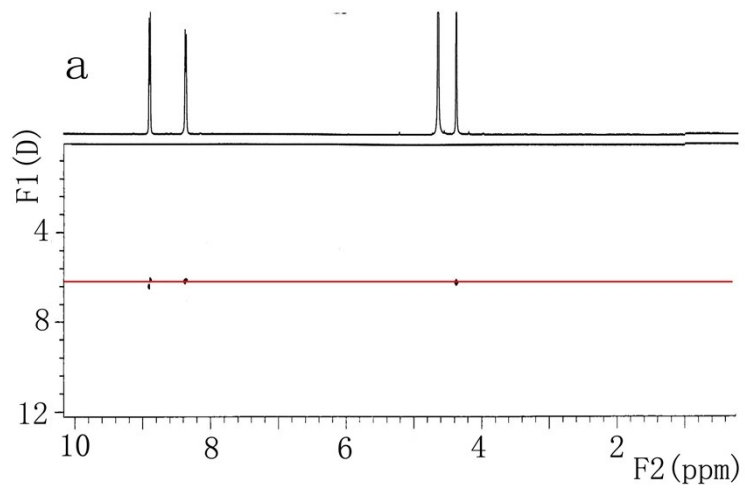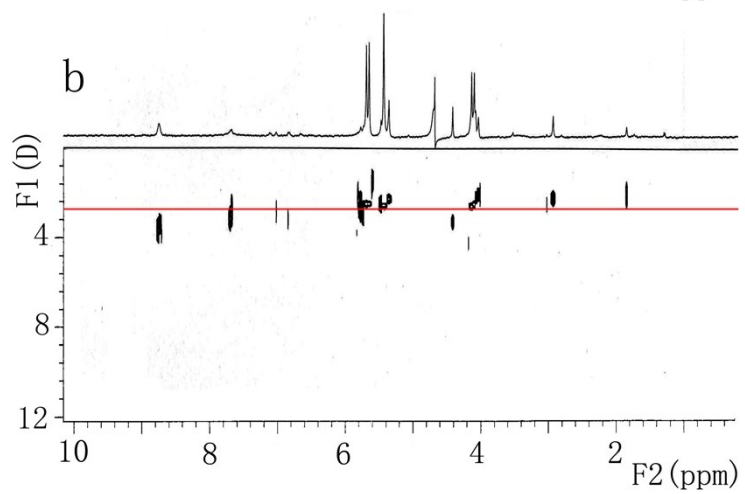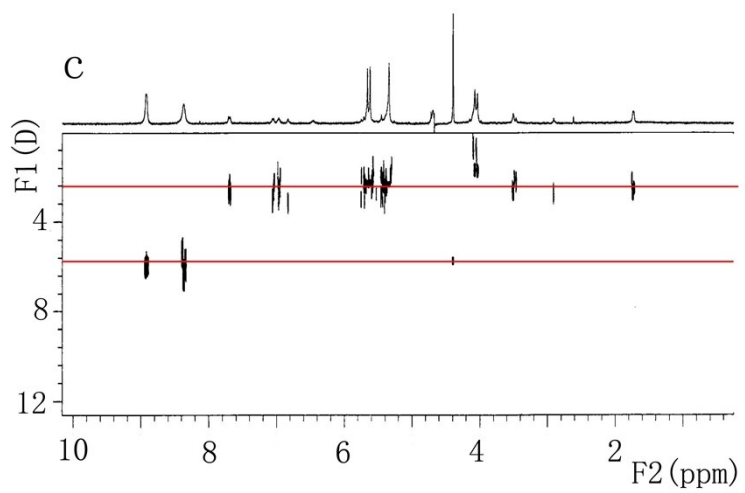

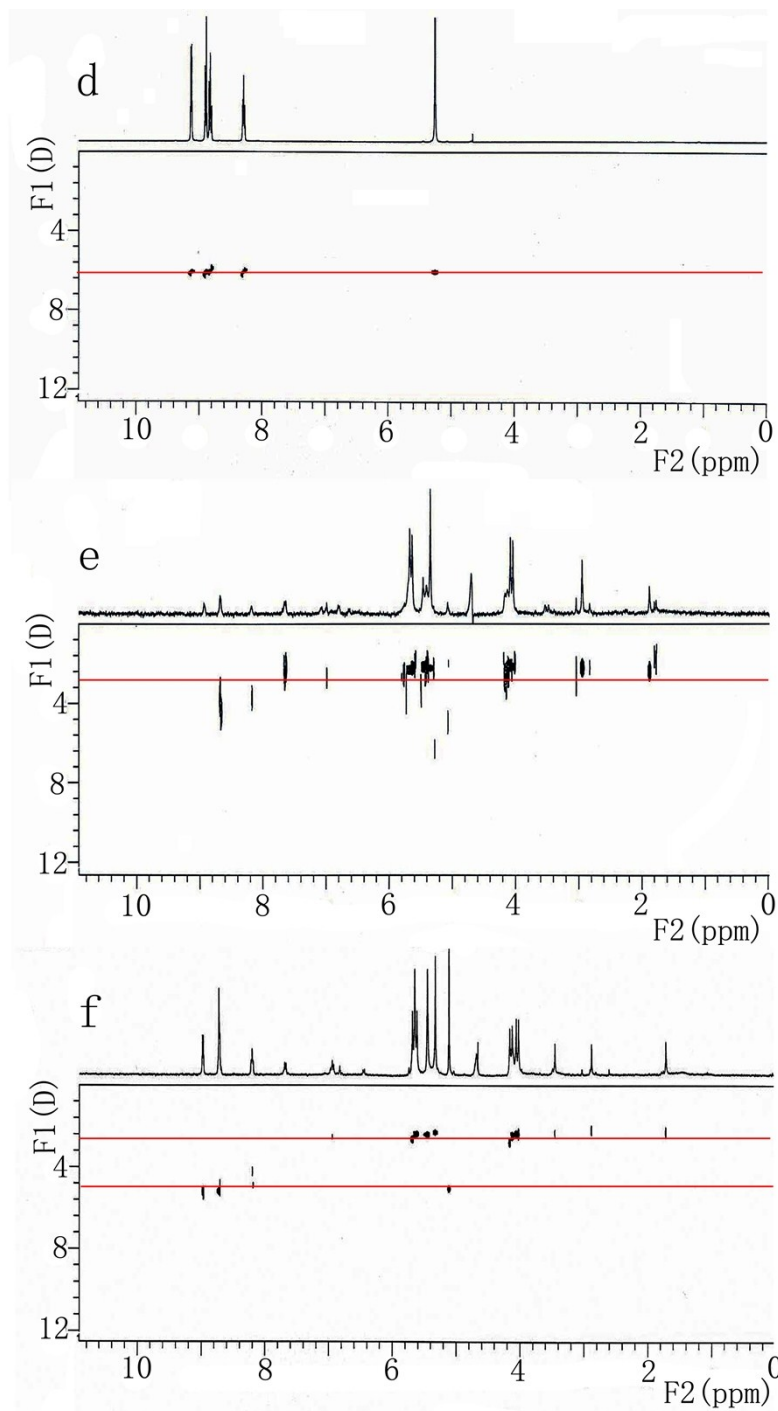

Fig. 4S DOSY NMR spectral changes for Q[8]-ThT-PQ (a-c) and Q[8]-ThT-DQ(d-f) system in D<sub>2</sub>O.

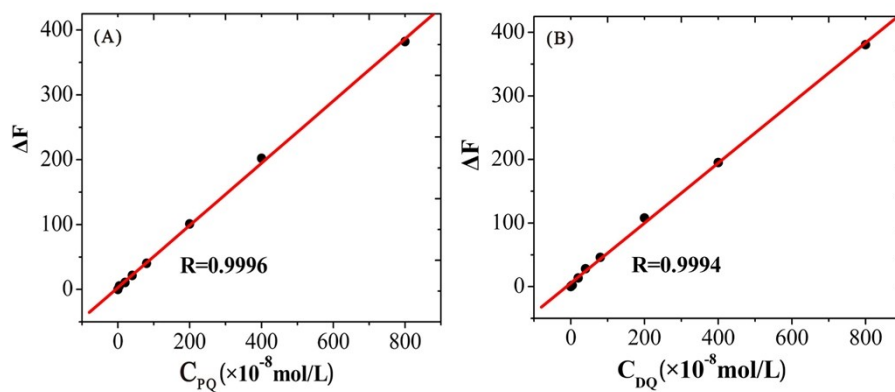

Fig. 5S a Stern-Volmer plot describing the PQ(A) and DQ(B) concentration dependence of the fluorescence intensity of the Q[8]-ThT complexes, a linearity is observed throughout the following range of PQ and DQ concentrations

**Table 1S.** Selectivity study<sup>a</sup>

| Foreign species                                                                     | Tolerated interference/analyte ratio (w/w) <sup>b</sup> |
|-------------------------------------------------------------------------------------|---------------------------------------------------------|
| K <sup>+</sup> , Mg <sup>2+</sup> , SO <sub>4</sub> <sup>2-</sup> , Cl <sup>-</sup> | 60                                                      |
| Na <sup>+</sup> , H <sub>2</sub> PO <sub>4</sub> <sup>-</sup>                       | 80                                                      |
| Cu <sup>2+</sup> , NH <sub>4</sub> <sup>+</sup>                                     | 30                                                      |
| Ca <sup>2+</sup>                                                                    | 6                                                       |
| Fe <sup>3+</sup>                                                                    | 10                                                      |

<sup>a</sup> C<sub>ThT</sub> = C<sub>Q[8]</sub> = C<sub>herbicides</sub> = 2 × 10<sup>-5</sup> mol L<sup>-1</sup> in aqueous solution at 25.0 °C.

<sup>b</sup> Maximum concentration of interference causing a relative error of <5% in analytical signal.

**Table 2S.** Maximum concentration tolerated for other quaternary ammonium salt of herbicide to produce interference in PQ/DQ determination.

| Interference of PQ | Maximum allowed concentration (mol L <sup>-1</sup> ) | Interference of DQ | Maximum allowed concentration (mol L <sup>-1</sup> ) |
|--------------------|------------------------------------------------------|--------------------|------------------------------------------------------|
| DQ                 | 5 × 10 <sup>-7</sup>                                 | PQ                 | 5 × 10 <sup>-7</sup>                                 |
| DF                 | 5 × 10 <sup>-7</sup>                                 | DF                 | 5 × 10 <sup>-7</sup>                                 |

**Table 3S.** Recovery of PQ and DQ in water samples.<sup>a</sup>

| Herbicides | Added<br>(×10 <sup>-6</sup> mol) | Found<br>(×10 <sup>-6</sup> mol) | This method               |         | HPLC                      |         |
|------------|----------------------------------|----------------------------------|---------------------------|---------|---------------------------|---------|
|            |                                  |                                  | Recovery <sup>b</sup> (%) | RSD (%) | Recovery <sup>b</sup> (%) | RSD (%) |
| PQ         | 10                               | 10.53                            | 105.3                     | 3.89    | 92.6%                     | 3.53    |
|            | 20                               | 21.77                            | 108.8                     | 4.01    | 91.5%                     | 2.95    |
|            | 40                               | 42.01                            | 105.0                     | 3.75    | 92.2%                     | 3.18    |
| DQ         | 10                               | 10.61                            | 106.1                     | 4.77    | 92.6%                     | 2.98    |
|            | 20                               | 21.63                            | 108.2                     | 5.02    | 91.5%                     | 3.53    |
|            | 40                               | 41.91                            | 104.8                     | 4.95    | 92.2%                     | 3.61    |

<sup>a</sup> 2 × 10<sup>-5</sup> mol L<sup>-1</sup> Q[8], 2 × 10<sup>-5</sup> mol L<sup>-1</sup> ThT, in water at 25.0 °C. From the Huaxi river, Guizhou province, China.

<sup>b</sup> Recoveries were means from triplicate determinations.

**Table 4S.** Recovery of PQ and DQ in cabbage samples.<sup>a</sup>

| Herbicides | Added<br>(×10 <sup>-6</sup> mol) | Found<br>(×10 <sup>-6</sup> mol) | This method               |         | HPLC                      |         |
|------------|----------------------------------|----------------------------------|---------------------------|---------|---------------------------|---------|
|            |                                  |                                  | Recovery <sup>b</sup> (%) | RSD (%) | Recovery <sup>b</sup> (%) | RSD (%) |

|    |    |       |       |      |       |      |
|----|----|-------|-------|------|-------|------|
| PQ | 10 | 10.72 | 107.2 | 4.13 | 92.3% | 3.22 |
|    | 20 | 21.22 | 106.1 | 4.58 | 91.1% | 2.74 |
|    | 40 | 41.96 | 104.9 | 5.07 | 91.5% | 2.55 |
| DQ | 10 | 10.68 | 106.8 | 5.11 | 92.3% | 4.01 |
|    | 20 | 21.14 | 105.7 | 4.68 | 91.1% | 3.36 |
|    | 40 | 41.96 | 104.9 | 3.95 | 91.5% | 3.05 |

<sup>a</sup>  $2 \times 10^{-5}$  mol L<sup>-1</sup> Q[8],  $2 \times 10^{-5}$  mol L<sup>-1</sup> ThT, in water at 25.0 °C. From the Huaxi river, Guizhou province, China.

<sup>b</sup> Recoveries corresponded to the average from triplicate determinations.
